# Supplementary material
Source: PubMed Central journal article supplement (PMC6159957)
Supplement: jci-128-121957-s291.pdf [file jci-128-121957-s291.pdf]

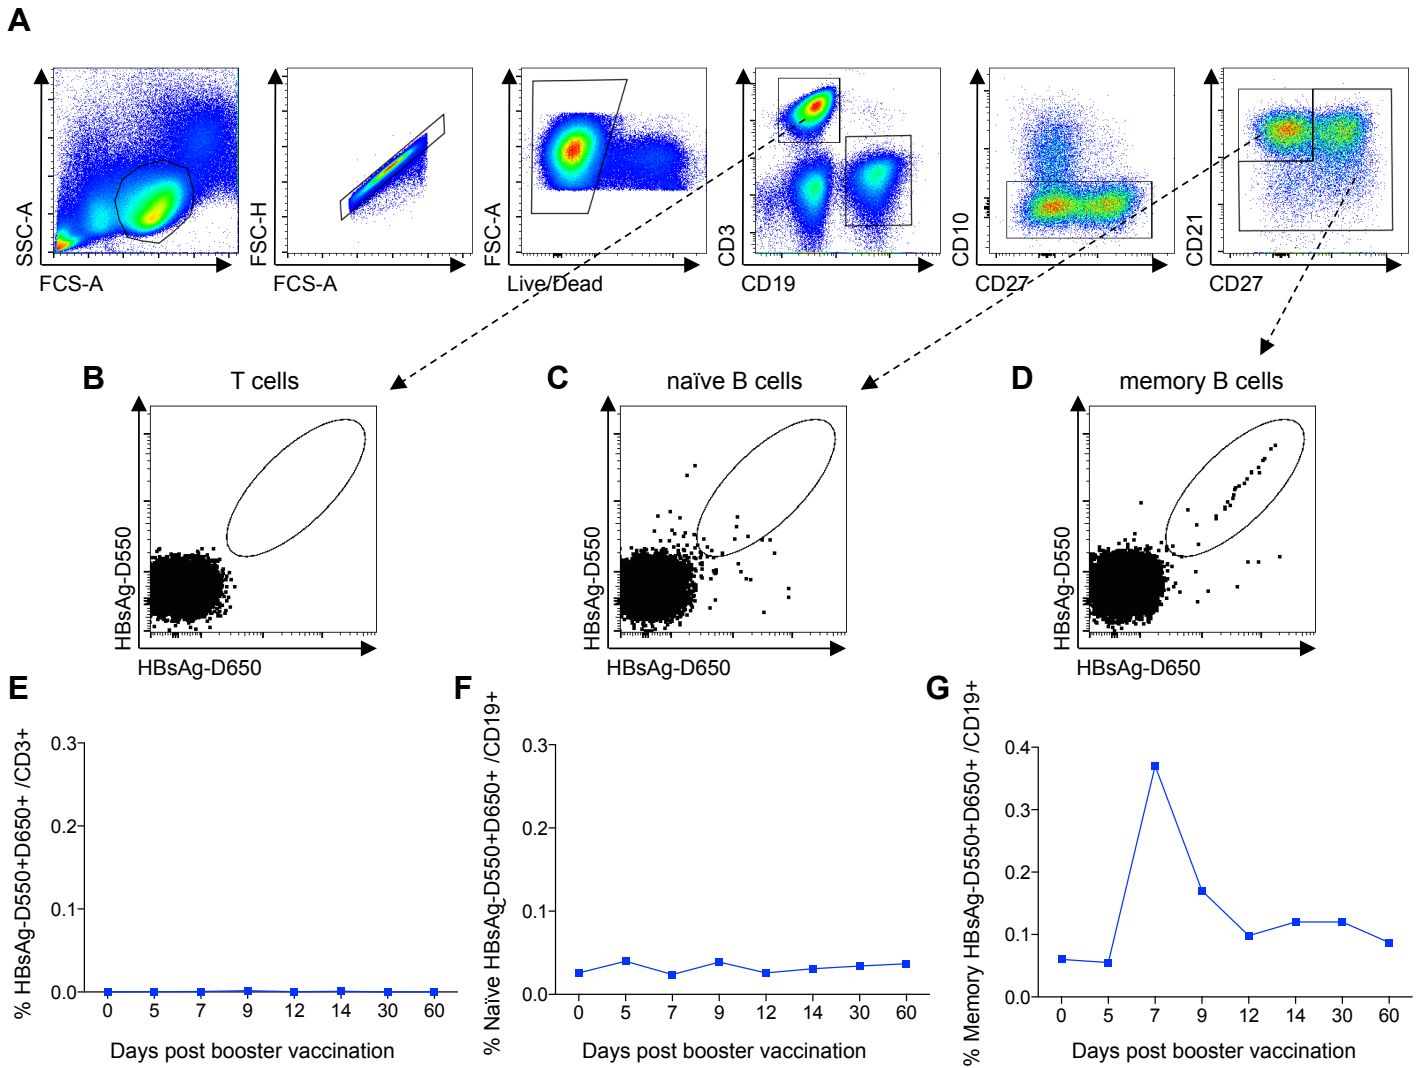

**Supplementary Figure 1: Fluorescently labeled HBsAg-baits bind specifically to memory B cells after booster HBV vaccination**

PBMCs of a subject receiving an HBV-booster vaccination were stained longitudinally with live/dead, anti-CD3, anti-CD19, anti-CD10, anti-CD27, anti-CD21, HBsAg-D550 and HBsAg-D650. **A)** shows the gating strategy for detection of HBsAg-specific memory B cells (MBCs); plots reshown from Fig 7A. HBsAg-D550 and HBsAg-D650 binding to T cells (**B**), to naïve B cells (**C**), and to MBCs (**D**) are shown. Longitudinal detection over 60 days post-booster vaccination of double positive HBsAg-D550<sup>+</sup>D650<sup>+</sup> T cells (**E**), naïve B cells (**F**) and MBCs (**G**) are shown.

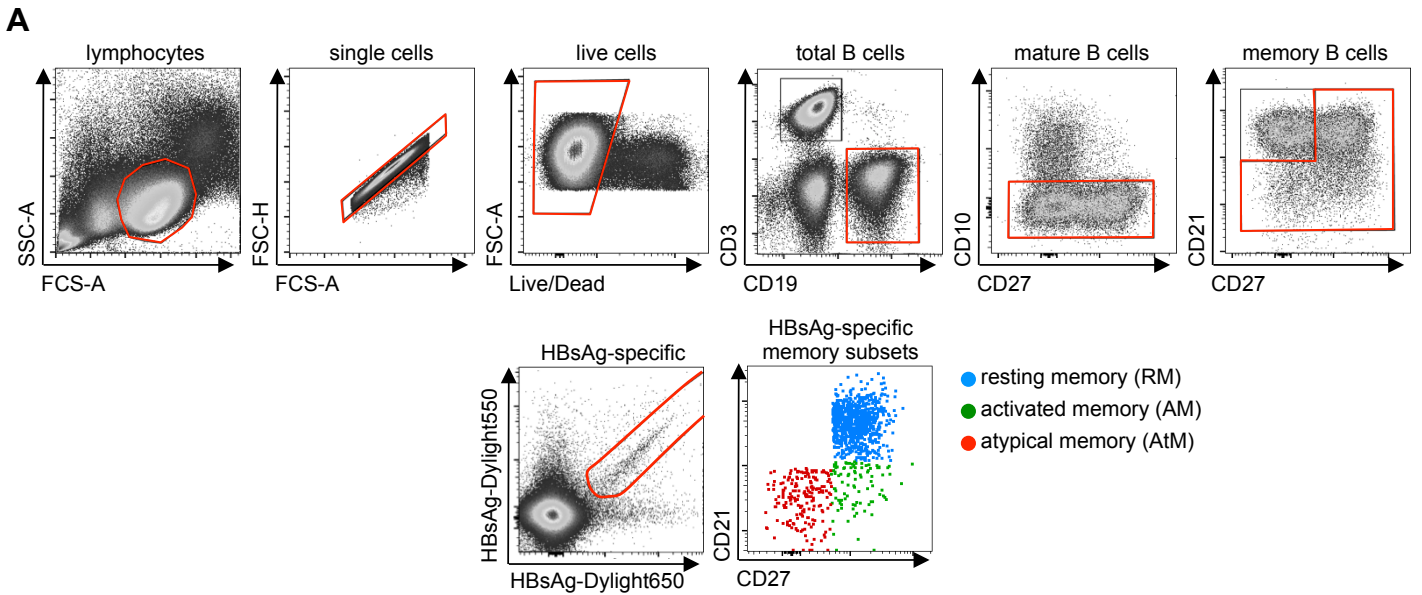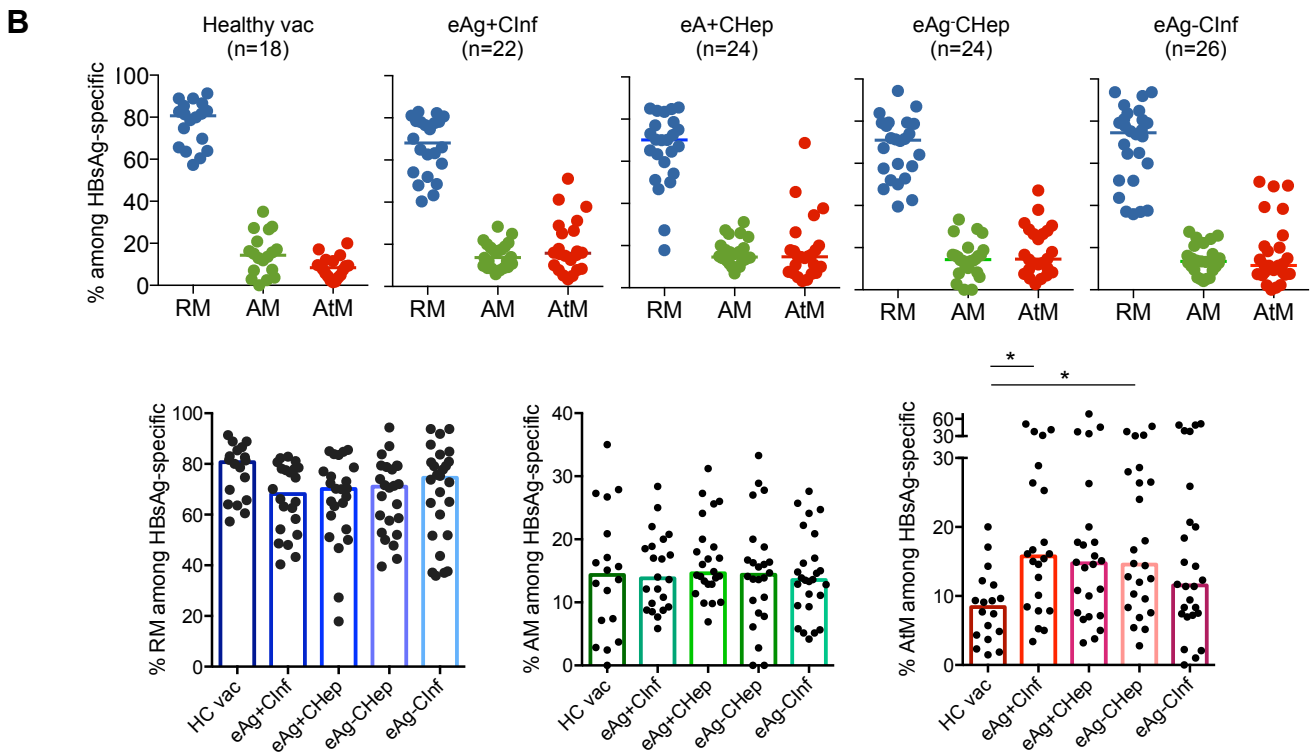

**Supplementary Figure 2: Manual gating strategy and frequency of different memory B cell subsets among HBsAg-specific B cells in chronic HBV patients**

**A)** PBMCs were stained with live/dead, anti-CD3, anti-CD19, anti-CD10, anti-CD27, anti-CD21, HBsAg-DyLight550 and HBsAg-DyLight650. Gating strategy of dual-stained HBsAg-specific B cells and their distribution into different subsets of memory B cells [resting (RM), activated (AM) and atypical (AtM) memory B cells]. Plots reshown from Fig 7A and Sfig 1A. Last two FACS plots (below; HBsAg-specific) are showing downsampled memory B cells concatenated from 96 CHB samples. **B)** Frequency of RM, AM and AtM B cells among HBsAg-specific cells in healthy and HBV patients with HBeAg+ chronic infection, HBeAg+ chronic hepatitis, HBeAg- chronic hepatitis and HBeAg- chronic infection. Data are presented as median and statistical analysis was performed by the Kruskal-Wallis test followed by Dunn's multiple comparisons test (B); \*,  $P < 0.05$ .

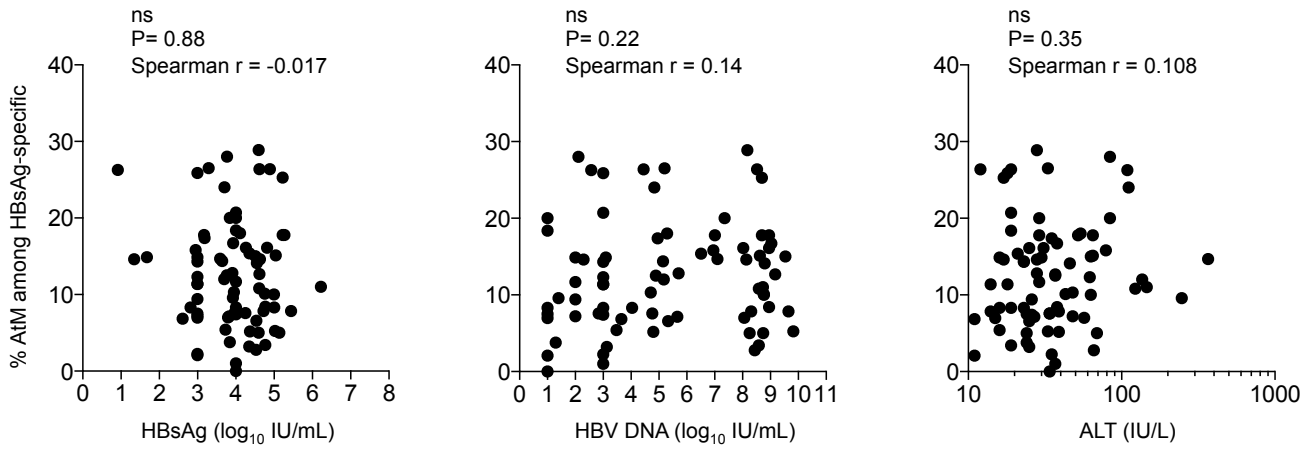

**Supplementary Figure 3: No correlation of HBsAg-specific B cells with AtM phenotype and virological/ biochemical parameters**

Correlation of frequency of AtM among HBsAg-specific B cells with serum HBsAg (left), HBV-DNA (middle) and ALT (right) levels measured in 76 patients with chronic HBV infection. Spearman's Rank correlation.

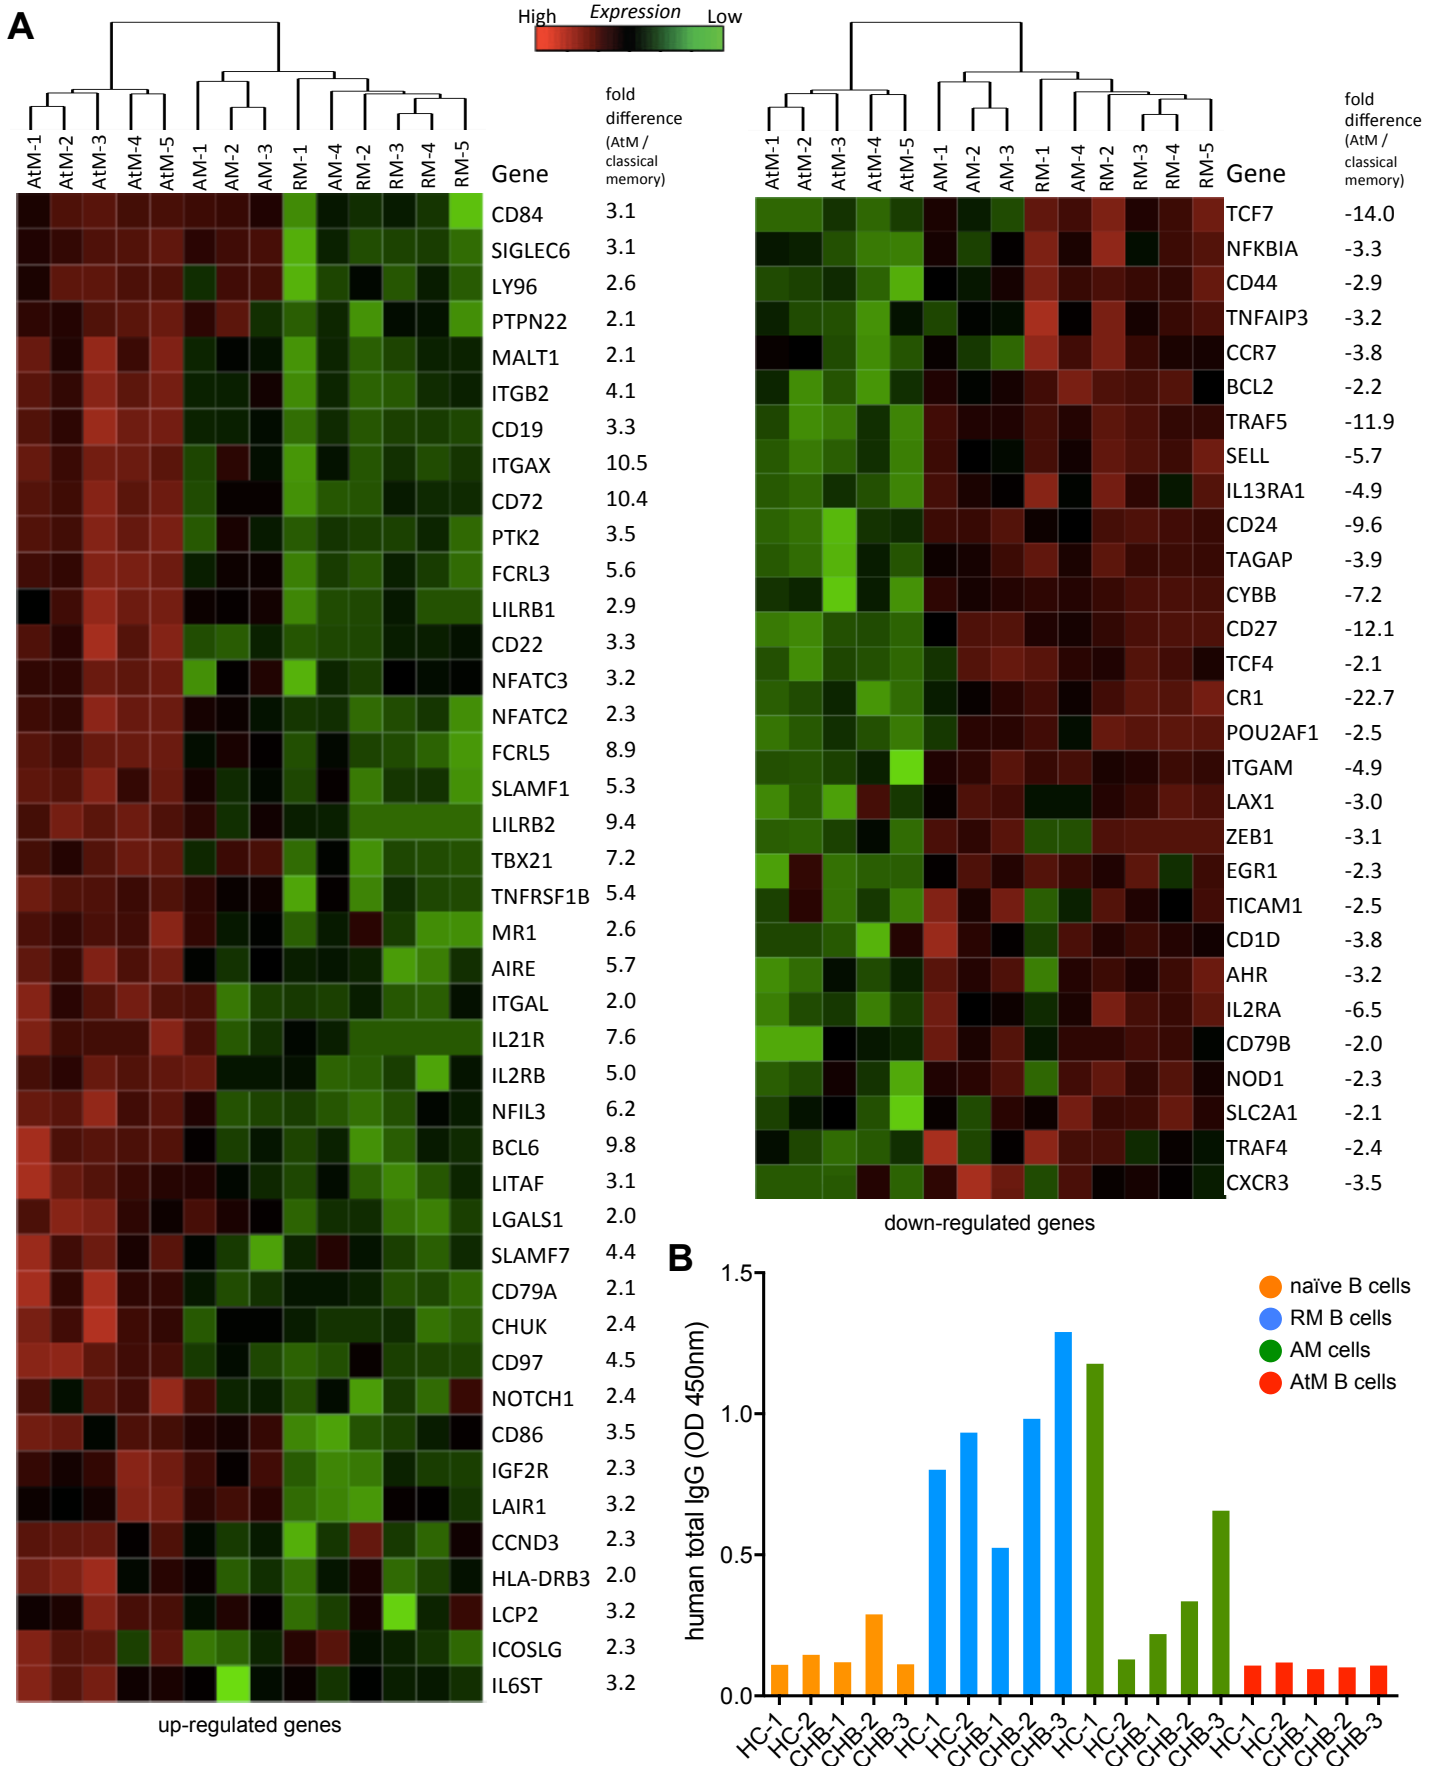

**Supplementary Figure 4: Gene expression profile and functionality of AtM B cells versus RM and AM B cells in chronic HBV infection.**

**A)** Three different memory B cell (MBC) subsets (based on the expression of CD21 and CD27) from 5 chronic HBV patients were FACS sorted and analyzed for their immune genes expression profile by NanoString technology. A total of 588 immune genes was analyzed. **Left:** 42 genes were >2-fold up regulated ( $p < 0.05$ ) in AtM compared to the two classical MBCs. **Right:** 29 genes were >2-fold down regulated in AtM compared to the classical MBCs. **B)** 2000 naïve, RM, AM and AtM B cells were FACS sorted and cultured in the presence of CpG, sCD40L, IL-2, IL-10, IL-15 for 4 days and subsequently with IL-2, IL-6, IL-10 and IL-15 for another 3 days. Total human IgG was measured in the supernatants by ELISA assay.

**Supplementary Table 1:** List of antibodies used in this study

| Antigen         | Fluorochrome                                                      | Manufacturer   | Clone   | Catalog number |
|-----------------|-------------------------------------------------------------------|----------------|---------|----------------|
| CD3             | BV605                                                             | BioLegend      | OKT3    | 317322         |
| CD3             | BV500                                                             | BD Biosciences | UCH-T1  | 561416         |
| CD10            | PE-CF594                                                          | BD Biosciences | HI10A   | 562396         |
| CD19            | BV510                                                             | BD Biosciences | SJ25C1  | 562947         |
| CD21            | BV421                                                             | BD Biosciences | B-LY4   | 562966         |
| CD23            | BUV395                                                            | BD Biosciences | M-L233  | 564203         |
| CD24            | PerCP-Cy5.5                                                       | BioLegend      | ML5     | 311116         |
| CD27            | BV650                                                             | BD Biosciences | L128    | 563228         |
| CD38            | PE-Cy7                                                            | BioLegend      | HB-7    | 356608         |
| CD39            | BV711                                                             | BD Biosciences | TU66    | 563680         |
| CD69            | APC-Cy7                                                           | BioLegend      | FN50    | 310914         |
| CD73            | BV605                                                             | BD Biosciences | AD2     | 563199         |
| CD95            | BV737                                                             | BD Biosciences | DX2     | 564710         |
| HLA-DR          | AF700                                                             | BioLegend      | L243    | 307626         |
| IgG             | BV786                                                             | BD Biosciences | G18-145 | 564230         |
| CD279<br>(PD-1) | FITC                                                              | BD Biosciences | MIH4    | 557860         |
| CD4             | BV650                                                             | BD Biosciences | SK3     | 563876         |
| CD8             | PE-Cy7                                                            | BD Biosciences | RPA-T8  | 557746         |
| CD197<br>(CCR7) | Biotin (plus APC-streptavidin from BD Biosciences; cat no 554067) | BD Biosciences | 3D12    | 557648         |
| CD45RA          | FITC                                                              | BD Biosciences | HI100   | 555488         |
